# Supplementary material
Source: Royal Society of Chemistry journal article supplement (doi:10.1039/d6sm00212a)
Supplement: d6sm00212a1.pdf [file d6sm00212a1.pdf]

## 1 **Supporting Information**

### 2 **Dynamic water film assisted laser micromachining of micro-array structured** 3 **surfaces for inducing hydrophobicity: Analysis model and experimental study**

4 Jinda Yang <sup>a</sup>, Zhongxu Lian <sup>ab\*</sup>, Haonan Jin <sup>a</sup>, Jiaqi Wang <sup>a\*</sup>, Jinkai Xu <sup>a</sup>, Yanling Tian <sup>b</sup>

5 <sup>a</sup>*Ministry of Education Key Laboratory for Cross-Scale Micro and Nano Manufacturing, College of Mechanical and*  
6 *Electrical Engineering, Changchun University of Science and Technology, Changchun 130022, China*

7 <sup>b</sup>*School of Engineering, University of Warwick, Coventry CV4 7AL, United Kingdom*

8

9 \*Corresponding author.

10 E-mail address: lianzhongxu@cust.edu.cn; jqwang@cust.edu.cn

11

12

13 Fig. S1 illustrates the principle and method of measuring water film thickness using a laser displacement  
 14 sensor. Due to the transparency of water, the laser beam not only reflects off the water surface but also  
 15 penetrates the water film, generating multiple reflections at other interfaces, which leads to fluctuations in the  
 16 measured signal (denoted as  $h_2$ ). To address this issue, black dye was uniformly injected into the water film  
 17 to render it opaque, ensuring that the laser beam reflects solely off the water surface and yields a stable distance  
 18 reading,  $h_3$ . Assuming the distance from the sensor to the workpiece surface in the absence of the water film  
 19 is  $h_1$ , the water film thickness at the corresponding location is calculated as  $h_3 - h_1$ . Using this method, the  
 20 water film thickness in the DWFALM process was measured to be approximately 41.4  $\mu\text{m}$ .

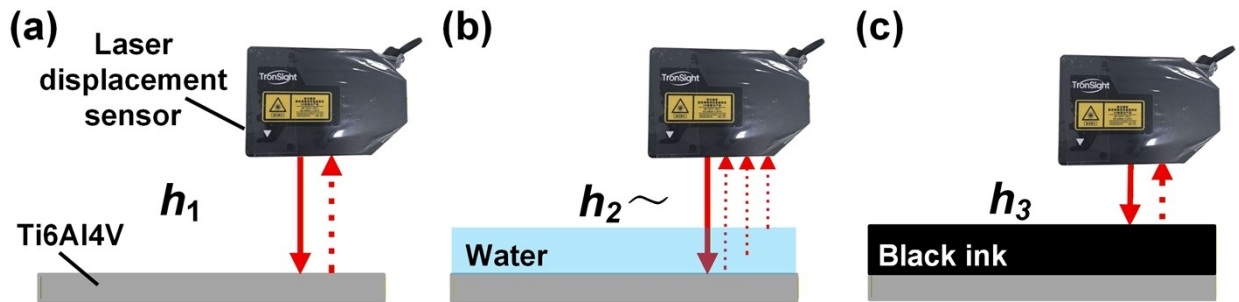

21  
 22 **Fig. S1.** Measurement method of moving water film.

23

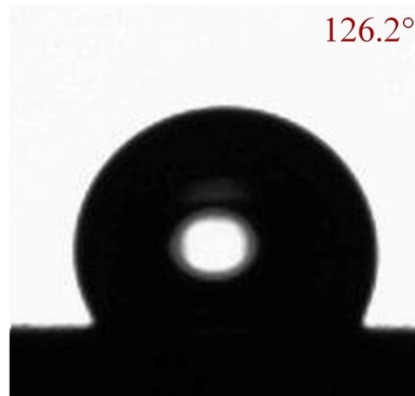

24  
 25 **Fig. S2.** Image of the contact angle on a smooth surface after fluorination treatment.

26

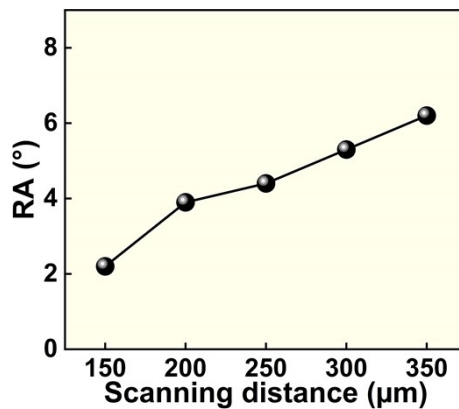

27  
 28 **Fig. S3.** Variation trend of RA with scanning spacing.
